# Supplementary material for: Chronic Glaucoma Using Biodegradable Microspheres to Induce Intraocular Pressure Elevation. Six-Month Follow-Up
Source: MDPI journal article supplement (doi:10.3390/biomedicines9060682), 2021-06-16
Supplement: s1 [file s1]

Supplementary Materials

# Chronic Glaucoma Using Biodegradable Microspheres to Induce Intraocular Pressure Elevation. Six-Month Follow-Up

**Table S1.** Structural analysis of neuroretina by optical coherence tomography, evaluating the left eyes of animals that had previously received the Ms20/10 model in the right eye.

| OCT PARAMETERS<br>( $\mu\text{m}$ ) | BASELINE<br>Mean $\pm$ SD | LEFT EYE, MICROSPHERE 20/10 MODEL |        |                          |                    |       |              |                    |        |              |                    |        |              |
|-------------------------------------|---------------------------|-----------------------------------|--------|--------------------------|--------------------|-------|--------------|--------------------|--------|--------------|--------------------|--------|--------------|
|                                     |                           | 8 w                               |        |                          | 12 w               |       |              | 18 w               |        |              | 24 w               |        |              |
|                                     |                           | Mean $\pm$ SD                     | %Ch    | <i>p</i>                 | Mean $\pm$ SD      | %Ch   | <i>p</i>     | Mean $\pm$ SD      | %Ch    | <i>p</i>     | Mean $\pm$ SD      | %Ch    | <i>p</i>     |
| <b>RETINAL THICKNESS</b>            |                           |                                   |        |                          |                    |       |              |                    |        |              |                    |        |              |
| CENTRAL                             | 275.13 $\pm$ 13.09        | 251.50 $\pm$ 7.76                 | −8.59  | 0.080                    | 267.20 $\pm$ 16.23 | −2.88 | 0.416        | 265.40 $\pm$ 11.14 | −3.54  | <b>0.039</b> | 263.00 $\pm$ 11.33 | −4.41  | 0.173        |
| INNER INFERIOR                      | 255.71 $\pm$ 7.21         | 239.00 $\pm$ 5.29                 | −6.53  | <b>0.012<sup>#</sup></b> | 249.60 $\pm$ 6.10  | −2.39 | <b>0.042</b> | 239.80 $\pm$ 3.70  | −6.22  | <b>0.043</b> | 243.33 $\pm$ 9.83  | −4.84  | 0.075        |
| OUTER INFERIOR                      | 245.67 $\pm$ 4.77         | 231.50 $\pm$ 4.50                 | −5.77  | <b>0.005<sup>#</sup></b> | 239.20 $\pm$ 6.38  | −2.63 | 0.279        | 228.00 $\pm$ 3.67  | −7.19  | <b>0.042</b> | 236.50 $\pm$ 6.18  | −3.73  | <b>0.028</b> |
| INNER SUPERIOR                      | 251.50 $\pm$ 5.87         | 235.00 $\pm$ 9.66                 | −6.56  | <b>0.040</b>             | 241.60 $\pm$ 10.33 | −3.94 | 0.138        | 236.80 $\pm$ 8.95  | −5.84  | <b>0.042</b> | 247.50 $\pm$ 9.33  | −1.59  | 0.115        |
| OUTER SUPERIOR                      | 251.29 $\pm$ 6.44         | 241.00 $\pm$ 9.76                 | −4.09  | 0.058                    | 245.00 $\pm$ 5.14  | −2.50 | 0.588        | 240.00 $\pm$ 7.34  | −4.49  | 0.068        | 253.50 $\pm$ 7.63  | 0.88   | 0.600        |
| INNER NASAL                         | 254.75 $\pm$ 8.71         | 244.00 $\pm$ 10.86                | −4.22  | 0.228                    | 255.60 $\pm$ 10.35 | 0.33  | 0.686        | 244.00 $\pm$ 9.97  | −4.22  | <b>0.043</b> | 252.33 $\pm$ 13.56 | −0.95  | 0.599        |
| OUTER NASAL                         | 246.79 $\pm$ 5.31         | 241.00 $\pm$ 13.95                | −2.35  | 0.387                    | 246.00 $\pm$ 7.96  | −0.32 | 0.786        | 233.80 $\pm$ 2.86  | −5.26  | <b>0.042</b> | 250.00 $\pm$ 14.95 | 1.30   | 0.416        |
| INNER TEMPORAL                      | 250.25 $\pm$ 7.57         | 232.75 $\pm$ 6.99                 | −6.99  | <b>0.027</b>             | 242.60 $\pm$ 7.02  | −3.06 | 0.080        | 236.60 $\pm$ 5.32  | −5.45  | <b>0.042</b> | 242.33 $\pm$ 10.53 | −3.16  | 0.104        |
| OUTER TEMPORAL                      | 247.88 $\pm$ 5.61         | 236.50 $\pm$ 6.40                 | −4.59  | <b>0.028</b>             | 244.80 $\pm$ 6.05  | −1.24 | 0.786        | 236.20 $\pm$ 3.11  | −4.71  | <b>0.043</b> | 247.50 $\pm$ 9.58  | −0.15  | 0.686        |
| TOTAL VOLUME                        | 1.71 $\pm$ 0.36           | 1.68 $\pm$ 0.17                   | −1.75  | 0.134                    | 1.75 $\pm$ 0.41    | 2.34  | <b>0.042</b> | 1.69 $\pm$ 0.14    | −1.17  | 0.496        | 1.71 $\pm$ 0.13    | −0.29  | <b>0.027</b> |
| <b>RNFL THICKNESS</b>               |                           |                                   |        |                          |                    |       |              |                    |        |              |                    |        |              |
| GLOBAL                              | 46.00 $\pm$ 4.51          | 39.25 $\pm$ 2.98                  | −14.67 | 0.059                    | 45.00 $\pm$ 4.79   | −2.17 | 0.225        | 38.40 $\pm$ 1.81   | −16.52 | <b>0.043</b> | 42.50 $\pm$ 7.47   | −7.61  | 0.400        |
| INFERIOR TEMPORAL                   | 43.21 $\pm$ 7.53          | 37.00 $\pm$ 3.16                  | −14.37 | <b>0.022</b>             | 44.40 $\pm$ 6.10   | 2.75  | 0.686        | 35.00 $\pm$ 4.30   | −19.00 | <b>0.043</b> | 43.17 $\pm$ 11.97  | −0.09  | 0.752        |
| INFERIOR NASAL                      | 46.83 $\pm$ 6.37          | 42.50 $\pm$ 5.32                  | −9.25  | 0.252                    | 49.80 $\pm$ 11.45  | 6.34  | 0.893        | 38.40 $\pm$ 5.17   | −18.00 | <b>0.042</b> | 53.17 $\pm$ 17.10  | 13.54  | 0.753        |
| SUPERIOR TEMPORAL                   | 50.38 $\pm$ 8.94          | 37.50 $\pm$ 7.72                  | −25.57 | <b>0.024</b>             | 49.40 $\pm$ 5.94   | −1.95 | 0.144        | 42.40 $\pm$ 4.98   | −15.84 | <b>0.034</b> | 39.00 $\pm$ 3.28   | −22.59 | <b>0.027</b> |
| SUPERIOR NASAL                      | 41.13 $\pm$ 7.18          | 34.50 $\pm$ 10.63                 | −16.12 | 0.188                    | 37.40 $\pm$ 8.64   | −9.07 | 0.345        | 33.40 $\pm$ 6.42   | −18.79 | <b>0.042</b> | 36.00 $\pm$ 10.93  | −12.47 | 0.093        |
| NASAL                               | 43.67 $\pm$ 5.91          | 43.00 $\pm$ 5.35                  | −1.53  | 0.287                    | 40.60 $\pm$ 9.31   | −7.03 | 0.715        | 40.00 $\pm$ 3.87   | −8.40  | 0.141        | 43.50 $\pm$ 17.01  | −0.39  | 0.752        |

|                           |              |              |        |                          |              |        |              |              |        |              |              |        |              |
|---------------------------|--------------|--------------|--------|--------------------------|--------------|--------|--------------|--------------|--------|--------------|--------------|--------|--------------|
| TEMPORAL<br>GCL THICKNESS | 49.54 ± 8.37 | 37.50 ± 4.20 | −24.30 | <b>0.033</b>             | 49.60 ± 9.86 | 0.12   | 0.080        | 40.20 ± 3.03 | −18.85 | <b>0.042</b> | 41.33 ± 7.14 | −16.57 | <b>0.027</b> |
| CENTRAL                   | 23.46 ± 2.04 | 17.75 ± 3.30 | −24.34 | 0.058                    | 17.40 ± 1.81 | −25.83 | <b>0.043</b> | 19.60 ± 2.70 | −16.45 | <b>0.042</b> | 19.00 ± 2.68 | −19.01 | <b>0.042</b> |
| INNER INFERIOR            | 27.83 ± 1.52 | 23.00 ± 2.70 | −17.36 | 0.115                    | 25.80 ± 1.48 | −7.29  | 0.066        | 24.60 ± 1.34 | −11.61 | <b>0.034</b> | 24.00 ± 1.67 | −13.76 | <b>0.027</b> |
| OUTER INFERIOR            | 27.00 ± 1.21 | 22.25 ± 3.20 | −17.59 | 0.112                    | 24.20 ± 2.58 | −10.37 | 0.059        | 24.20 ± 0.83 | −10.37 | <b>0.039</b> | 23.00 ± 2.19 | −14.81 | <b>0.027</b> |
| INNER SUPERIOR            | 27.04 ± 1.42 | 18.75 ± 4.78 | −30.66 | <b>0.049</b>             | 22.20 ± 1.92 | −17.90 | <b>0.042</b> | 22.00 ± 0.70 | −18.64 | <b>0.042</b> | 21.67 ± 2.16 | −19.86 | <b>0.027</b> |
| OUTER SUPERIOR            | 25.96 ± 1.70 | 20.25 ± 1.50 | −22.00 | <b>0.028</b>             | 24.00 ± 3.00 | −7.55  | 0.336        | 24.40 ± 1.81 | −6.01  | 0.078        | 23.33 ± 2.94 | −10.13 | 0.078        |
| INNER NASAL               | 26.54 ± 1.91 | 23.75 ± 0.95 | −10.51 | 0.135                    | 22.20 ± 2.28 | −16.35 | <b>0.042</b> | 23.00 ± 1.87 | −13.34 | <b>0.042</b> | 21.67 ± 1.96 | −18.35 | <b>0.027</b> |
| OUTER NASAL               | 26.79 ± 1.50 | 23.50 ± 2.38 | −12.28 | <b>0.005<sup>#</sup></b> | 23.00 ± 2.82 | −14.15 | 0.102        | 24.00 ± 1.00 | −10.41 | <b>0.039</b> | 21.20 ± 1.30 | −20.87 | <b>0.042</b> |
| INNER TEMPORAL            | 26.88 ± 1.65 | 20.50 ± 7.04 | −23.71 | 0.239                    | 23.20 ± 2.49 | −13.66 | <b>0.043</b> | 24.20 ± 1.64 | −9.94  | <b>0.041</b> | 23.33 ± 1.21 | −13.17 | <b>0.024</b> |
| OUTER TEMPORAL            | 27.38 ± 1.31 | 22.00 ± 6.78 | −19.65 | 0.273                    | 25.40 ± 1.34 | −7.23  | 0.063        | 25.00 ± 0.70 | −8.69  | <b>0.038</b> | 24.17 ± 0.98 | −11.72 | <b>0.026</b> |
| TOTAL VOLUME              | 23.46 ± 2.04 | 17.75 ± 3.30 | −24.34 | 0.058                    | 17.40 ± 1.81 | −25.83 | <b>0.043</b> | 19.60 ± 2.70 | −16.45 | <b>0.042</b> | 19.00 ± 2.68 | −19.01 | <b>0.042</b> |

Abbreviations: OCT: optical coherence tomography; RNFL: retinal nerve fiber layer; GCL: ganglion cell layer; thickness in microns (μm); mean ± S D (SD: standard deviation); %Ch: percentage change in thickness loss (with respect to baseline);  $p < 0.05$  statistical significance (in bold);  $p < 0.02$  <sup>#</sup> statistical significance with Bonferroni correction for multiple comparisons
